# Supplementary material for: A High Neutrophil-Lymphocyte Ratio Is Associated With Increased Morbidity and Mortality in Patients With Coronavirus Disease 2019
Source: PubMed Central journal article supplement — Crit Care Explor. 2021 May 17;3(5):e0444. doi: 10.1097/CCE.0000000000000444 (PMC8133235; doi:10.1097/cce.0000000000000444), 2021-05-17
Supplement: cc9-3-e0444-s001.pdf [file cc9-3-e0444-s001.pdf]

**Supplemental table 1.** Factors associated with mortality after COVID-19.

| Variable            | Alive<br>(n=1363) | Dead<br>(n=708) | Univariable<br>P value | Multivariable         |         | Wave 1<br>March –May |                 |         | Wave 2<br>June – August |                 |         | Wave 3<br>September - December |                 |         |
|---------------------|-------------------|-----------------|------------------------|-----------------------|---------|----------------------|-----------------|---------|-------------------------|-----------------|---------|--------------------------------|-----------------|---------|
|                     |                   |                 |                        | HR<br>(95% CI)        | P value | Alive<br>(n=298)     | Dead<br>(n=142) | P value | Alive<br>(n=279)        | Dead<br>(n=118) | P value | Alive<br>(n=786)               | Dead<br>(n=448) | P value |
| Vasopressor use     | 559<br>(39.9)     | 550<br>(76.0)   | <0.001                 | 2.08<br>(1.67 – 2.58) | <0.001  | 146<br>(49.0)        | 109<br>(76.8)   | <0.001  | 103<br>(36.9)           | 87<br>(73.7)    | <0.001  | 289<br>(36.8)                  | 340<br>(75.9)   | <0.001  |
| Intubated           | 447<br>(31.9)     | 450<br>(62.2)   | <0.001                 | 1.36<br>(1.12 – 1.65) | 0.001   | 148<br>(49.7)        | 95<br>(66.9)    | 0.001   | 72<br>(25.8)            | 63<br>(53.4)    | <0.001  | 210<br>(26.7)                  | 280<br>(62.5)   | <0.001  |
| NLR >7.45           | 616<br>(45.2)     | 419<br>(59.2)   | <0.001                 | 1.32<br>(1.14 – 1.54) | 0.001   | 93<br>(31.2)         | 70<br>(49.3)    | <0.001  | 122<br>(43.7)           | 64<br>(54.2)    | 0.06    | 401<br>(51.0)                  | 285<br>(63.6)   | <0.001  |
| Age, mean (SD)      | 63.5<br>(15.3)    | 74.2<br>(11.6)  | <0.001                 | 1.05<br>(1.04 – 1.06) | <0.001  | 62.4<br>(13.7)       | 74.7<br>(11.5)  | <0.001  | 61.4<br>(17.1)          | 74.3<br>(11.4)  | <0.001  | 64.8<br>(15.1)                 | 74.2<br>(11.3)  | <0.001  |
| APACHE III<br>Score | 51.9<br>(23.2)    | 72.3<br>(28.6)  | <0.001                 | 1.01<br>(1.01 – 1.02) | <0.001  | 55.5<br>(25.5)       | 73.0<br>(26.4)  | <0.001  | 49.3<br>(24.1)          | 74.0<br>(29.1)  | <0.001  | 51.4<br>(21.8)                 | 71.6<br>(29.1)  | <0.001  |
| CKD                 | 485<br>(34.6)     | 374<br>(51.7)   | <0.001                 | -                     | -       | 98<br>(32.9)         | 74<br>(52.1)    | <0.001  | 89<br>(31.9)            | 70<br>(59.3)    | <0.001  | 287<br>(36.5)                  | 223<br>(49.8)   | <0.001  |
| Male gender         | 821<br>(58.6)     | 416<br>(57.5)   | 0.61                   | -                     | -       | 179<br>(60.1)        | 79<br>(55.6)    | 0.38    | 161<br>(57.7)           | 71<br>(60.2)    | 0.65    | 460<br>(58.5)                  | 259<br>(57.8)   | 0.81    |
| White race          | 797<br>(57.3)     | 471<br>(65.7)   | <0.001                 | -                     | -       | 156<br>(52.9)        | 88<br>(62.0)    | 0.07    | 134<br>(48.4)           | 75<br>(63.6)    | 0.006   | 479<br>(61.3)                  | 296<br>(67.1)   | 0.04    |
| Asthma              | 332<br>(23.7)     | 147<br>(20.3)   | 0.08                   | -                     | -       | 71<br>(23.8)         | 34<br>(23.9)    | 0.98    | 61<br>(21.9)            | 20<br>(17.0)    | 0.27    | 192<br>(24.4)                  | 91<br>(20.3)    | 0.10    |
| Cardiac disease     | 905<br>(64.6)     | 593<br>(81.9)   | <0.001                 | -                     | -       | 180<br>(60.4)        | 114<br>(80.3)   | <0.001  | 173<br>(62.0)           | 93<br>(78.8)    | 0.001   | 527<br>(67.1)                  | 374<br>(83.5)   | <0.001  |
| COPD                | 459<br>(32.8)     | 293<br>(40.5)   | <0.001                 | -                     | -       | 91<br>(30.5)         | 55<br>(38.7)    | 0.09    | 90<br>(32.3)            | 52<br>(44.1)    | 0.03    | 270<br>(34.4)                  | 182<br>(40.6)   | 0.03    |
| Diabetes            | 842<br>(60.1)     | 445<br>(61.5)   | 0.54                   | -                     | -       | 170<br>(57.1)        | 83<br>(58.5)    | 0.78    | 158<br>(56.6)           | 74<br>(62.7)    | 0.26    | 491<br>(62.5)                  | 277<br>(61.8)   | 0.82    |
| Dialysis            | 199<br>(14.2)     | 131<br>(18.1)   | 0.02                   | -                     | -       | 55<br>(18.5)         | 31<br>(21.8)    | 0.40    | 37<br>(13.3)            | 29<br>(24.6)    | 0.006   | 101<br>(12.9)                  | 67<br>(15.0)    | 0.30    |
| Hypertension        | 1214<br>(86.7)    | 678<br>(93.7)   | <0.001                 | -                     | -       | 255<br>(85.6)        | 127<br>(89.4)   | 0.26    | 231<br>(82.8)           | 115<br>(97.5)   | <0.001  | 699<br>(88.9)                  | 422<br>(94.2)   | 0.002   |
| Liver disease       | 303<br>(21.6)     | 173<br>(23.9)   | 0.24                   | -                     | -       | 64<br>(21.5)         | 31<br>(21.8)    | 0.93    | 66<br>(23.7)            | 25<br>(21.2)    | 0.59    | 163<br>(20.7)                  | 108<br>(24.1)   | 0.17    |

All variables except age and APACHE III are reported as a number, (%). Age and APACHE III are reported as mean (SD).
